# Supplementary figures and images for: Remarkable 3-methyl substituent effects on the cyclization reaction of diphenylamine derivative cation radicals in acetonitrileElectronic supplementary information (ESI) available: results of kinetic analysis for the reactions in Figs. 4 and 5. See http://www.rsc.org/suppdata/p2/b2/b201796b/
Source: Royal Society of Chemistry journal article supplement (doi:10.1039/b201796b), 2002-06-12

### Supplementary data

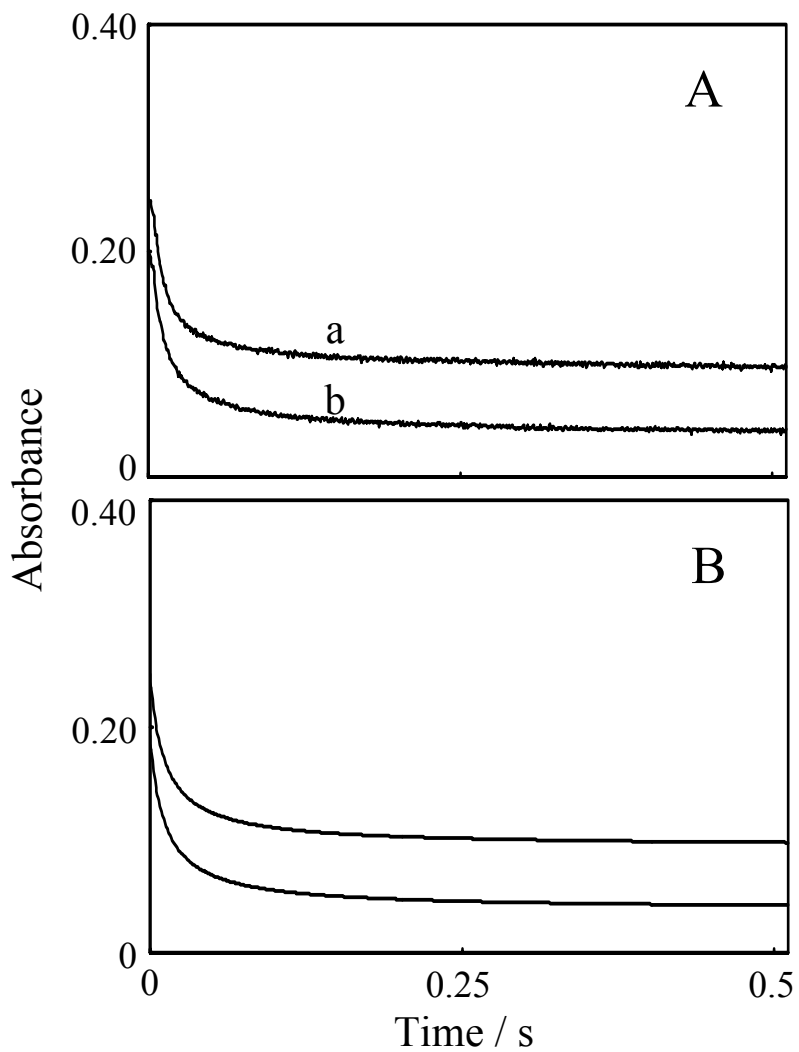

Fig. S1

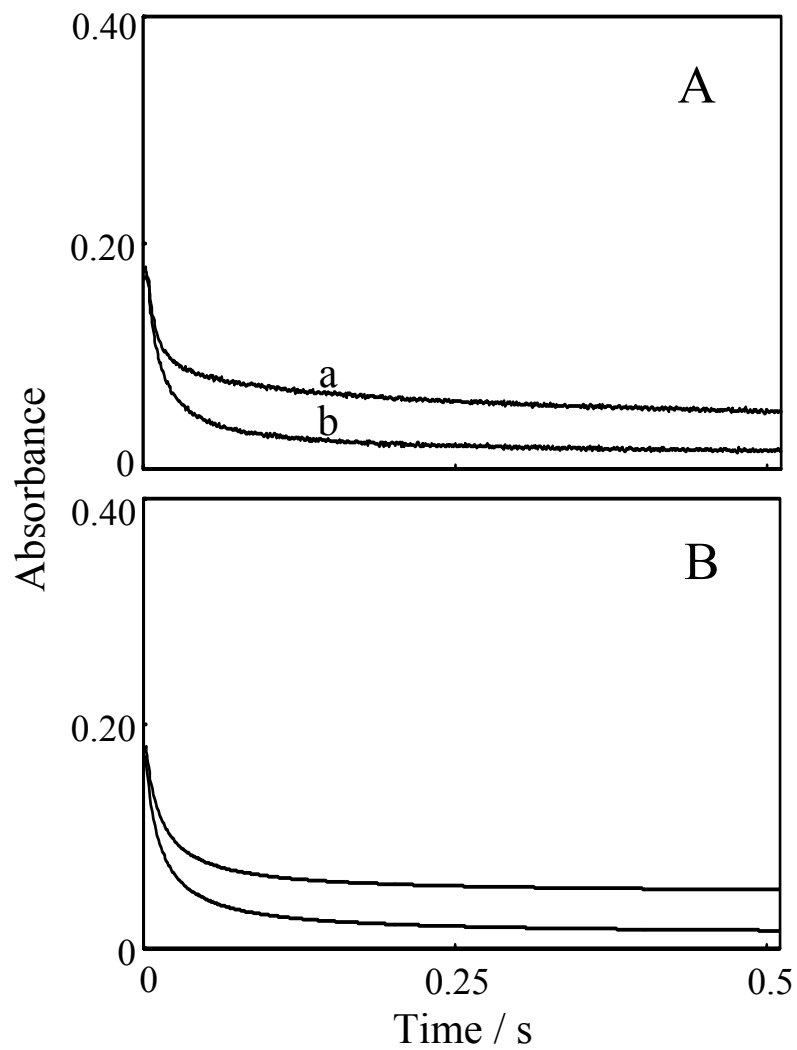

Fig. S2

Supplement: b201796b.pdf [file b201796b.pdf]
